# Supplementary material
Source: Copernicus journal article supplement (doi:10.5194/egusphere-2026-3268)

# Supplementary Material

## Species Biomass & Composition

**Figure S1.** Taxonomic composition of benthic communities across sampling stations in Northeast Greenland coastal systems. Panels (I) and (II) show absolute and cumulative benthic carbon biomass (g C), respectively, while panels (III) and (IV) show absolute and cumulative abundance (ind. m<sup>-2</sup>). Absolute values are shown as stacked bars partitioned by phylum, and cumulative panels display proportional contributions of each phylum to total community biomass or abundance. Colours indicate major benthic phyla. Stations are ordered by coastal system and inner–outer position within each system; Dove Bugt (DB), Ardencaple Fjord (ACF), and Kong Oscar Fjord (KOF).

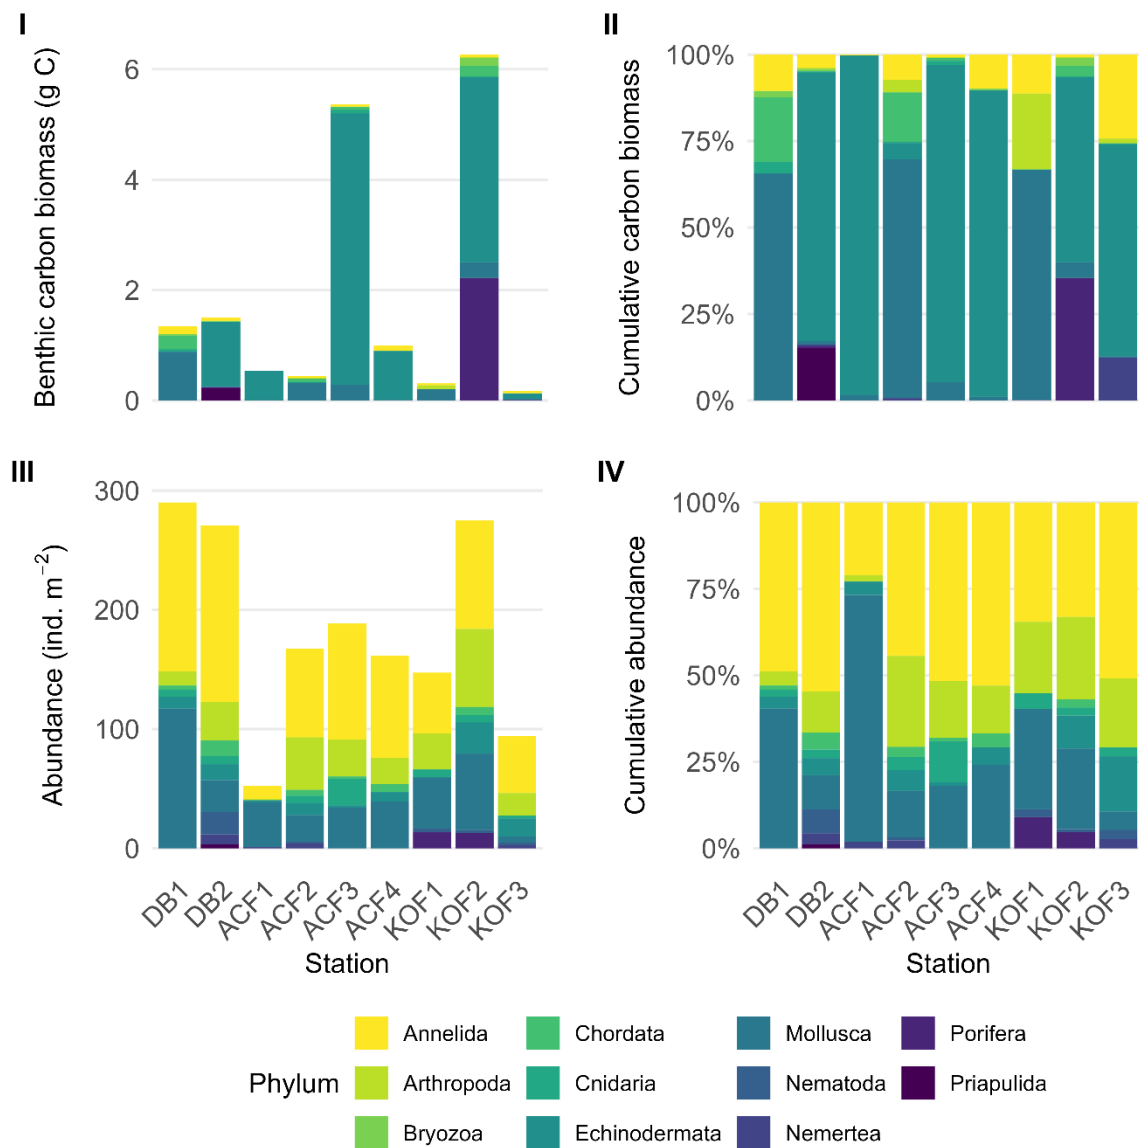



## Environmental Variables

**Figure S3.** Relative grain size composition across transects. Stacked bars show the percentage contribution of mud, silt, sand, and gravel to surface sediment composition at each transect. Percentages sum to 100 per cent for each transect.

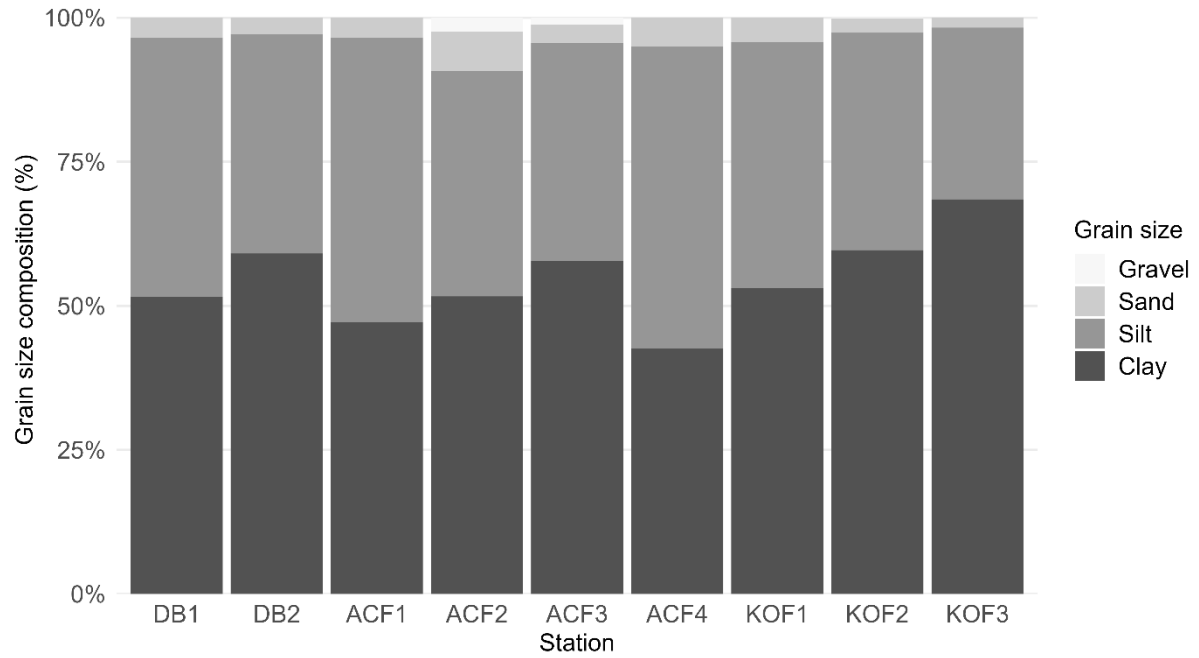

**Figure S4.** Multibeam bathymetry of three Northeast Greenland coastal systems: (i) Dove Bugt, (ii) Brede–Ardencaple Fjord, and (iii) Kong Oscar Fjord. High-resolution multibeam data (EM122) are shown as a colour overlay representing depth in metres, enhanced by hillshade. Background bathymetry is derived from NOAA and displayed in depth intervals (m). Grey areas represent land. Insets indicate the regional location of each coastal system within Northeast Greenland. Scale bars are shown in kilometres.

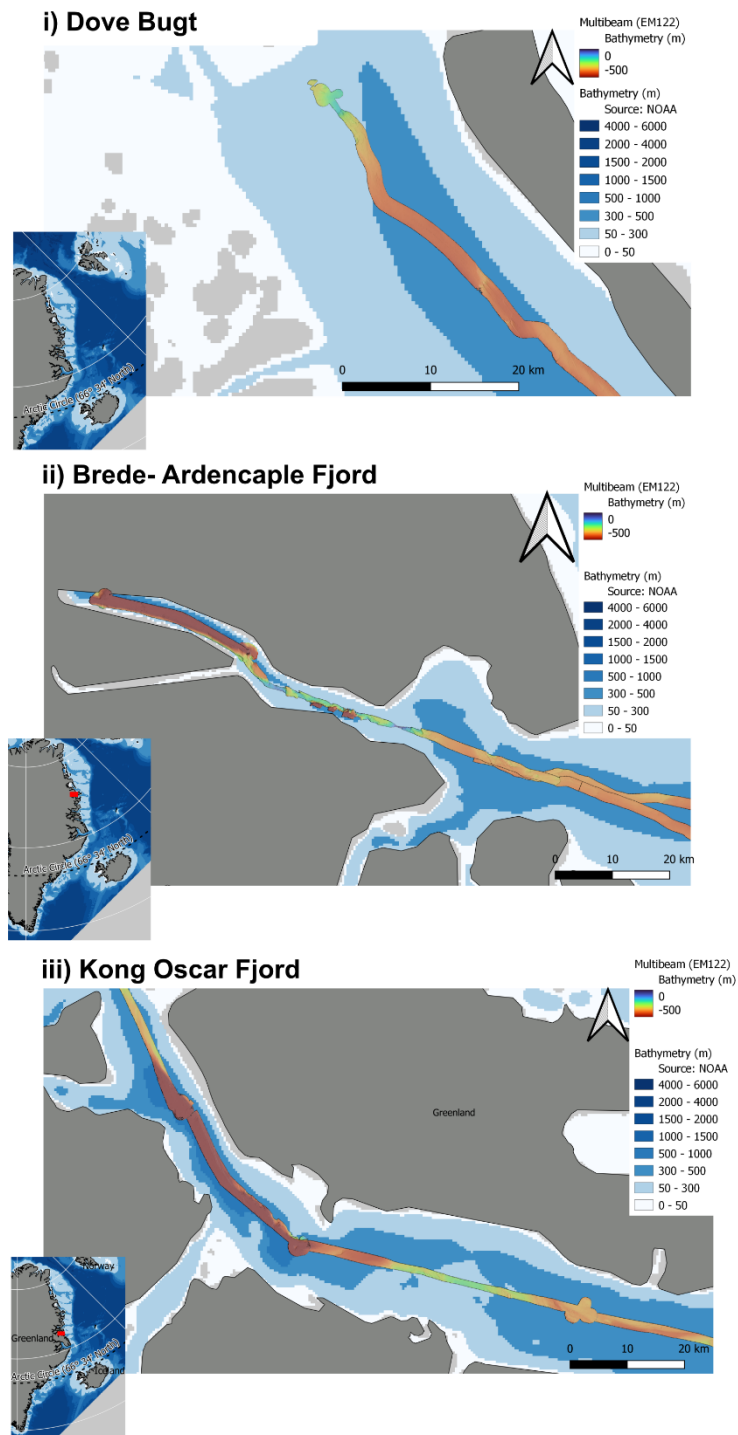

1 **Figure S5:** Violin plots show the environmental variation across coastal systems in Northeast Greenland  
 2 based on raw values. Mud, silt, sand, gravel are grain-size fractions that sum together to 100% and aspect  
 3 and slope are seabed topographic variables. Black points indicate individual station values, with violins  
 4 illustrating the distribution within each coastal system.

5

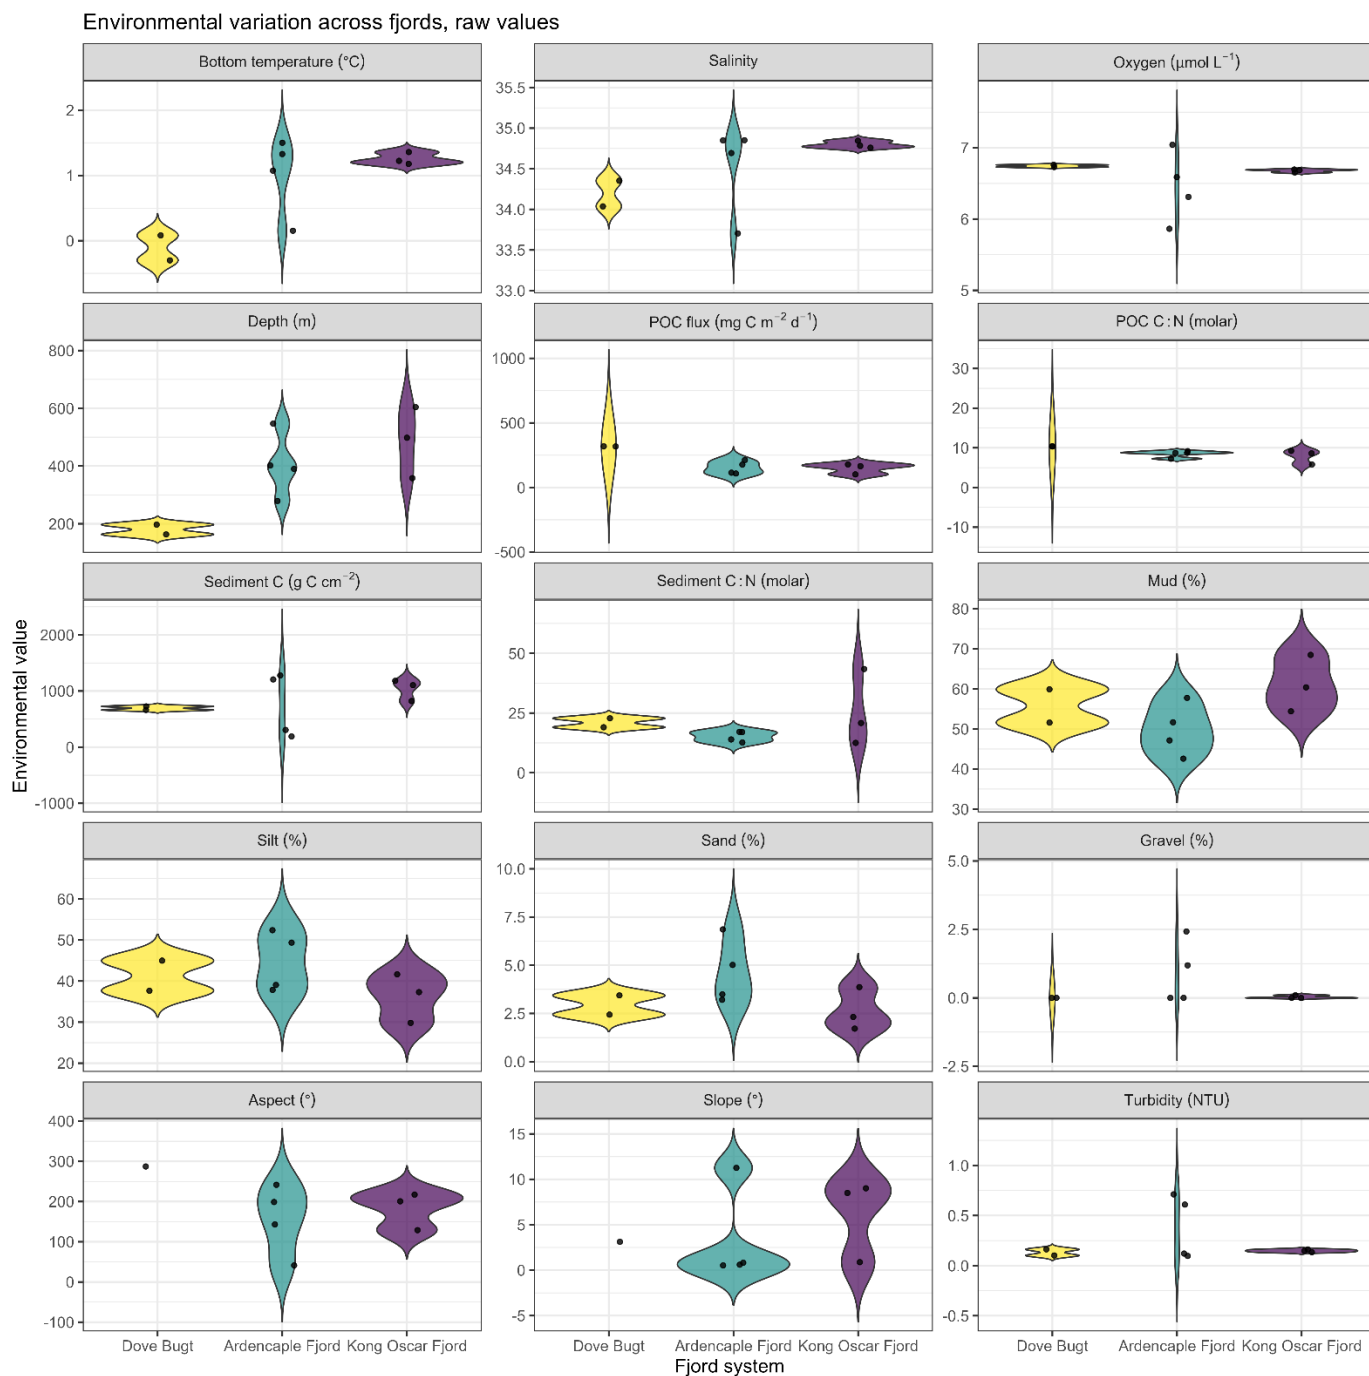

6

7 **Table S6.** Descriptive statistics for environmental variables measured across sampling stations in Northeast  
8 Greenland. For each parameter, the mean, standard deviation, and coefficient of variation (CV) are reported  
9 based on station-level values. CV is used as a relative measure of variability to facilitate comparison among  
10 variables with different units and ranges. Variability classes followed conventional thresholds: <5 %  
11 indicated very low variability, 5–20 % low, 20–50 % moderate, 50–90 % high, and >90 % extremely high.  
12 Several hydrographic variables exhibit low relative variability across stations, whereas carbon-related  
13 variables show moderate variability, and fluorescence and turbidity display high CV values driven by small  
14 absolute magnitudes rather than large absolute ranges.

| Parameter         | Mean     | Std Dev | CV (%) | Interpretation             |
|-------------------|----------|---------|--------|----------------------------|
| Depth             | 382      | 151.58  | 39.70% | Moderate variability       |
| Temperature       | 0.8438   | 0.6716  | 79.60% | High variability           |
| Salinity          | 34.5419  | 0.4188  | 1.21%  | Very low variability       |
| Oxygen            | 6.5924   | 0.3323  | 5.04%  | Low variability            |
| Fluorescence      | 0.0343   | 0.0314  | 91.50% | Extremely high variability |
| Turbidity         | 0.2494   | 0.2356  | 94.50% | Extremely high variability |
| Sediment Carbon   | 7.3345   | 3.5065  | 47.81% | Moderate variability       |
| Sediment CN ratio | 19.9305  | 9.4986  | 47.66% | Moderate variability       |
| Flux POC          | 181.2273 | 71.6113 | 39.51% | Moderate variability       |
| Flux CN ratio     | 8.6593   | 1.3928  | 16.08% | Low variability            |

16 **Figure S7.** Pairwise correlations among environmental variables measured across all stations in the three  
 17 Northeast Greenland coastal systems. Circles represent Pearson correlation coefficients ( $r$ ), with colour  
 18 indicating the direction (blue positive, red negative) and size reflecting the strength of the correlation. Values  
 19 are shown within each cell. Strong covariation among several hydrographic and carbon-related variables  
 20 highlights substantial multicollinearity within the environmental dataset (see Methods).

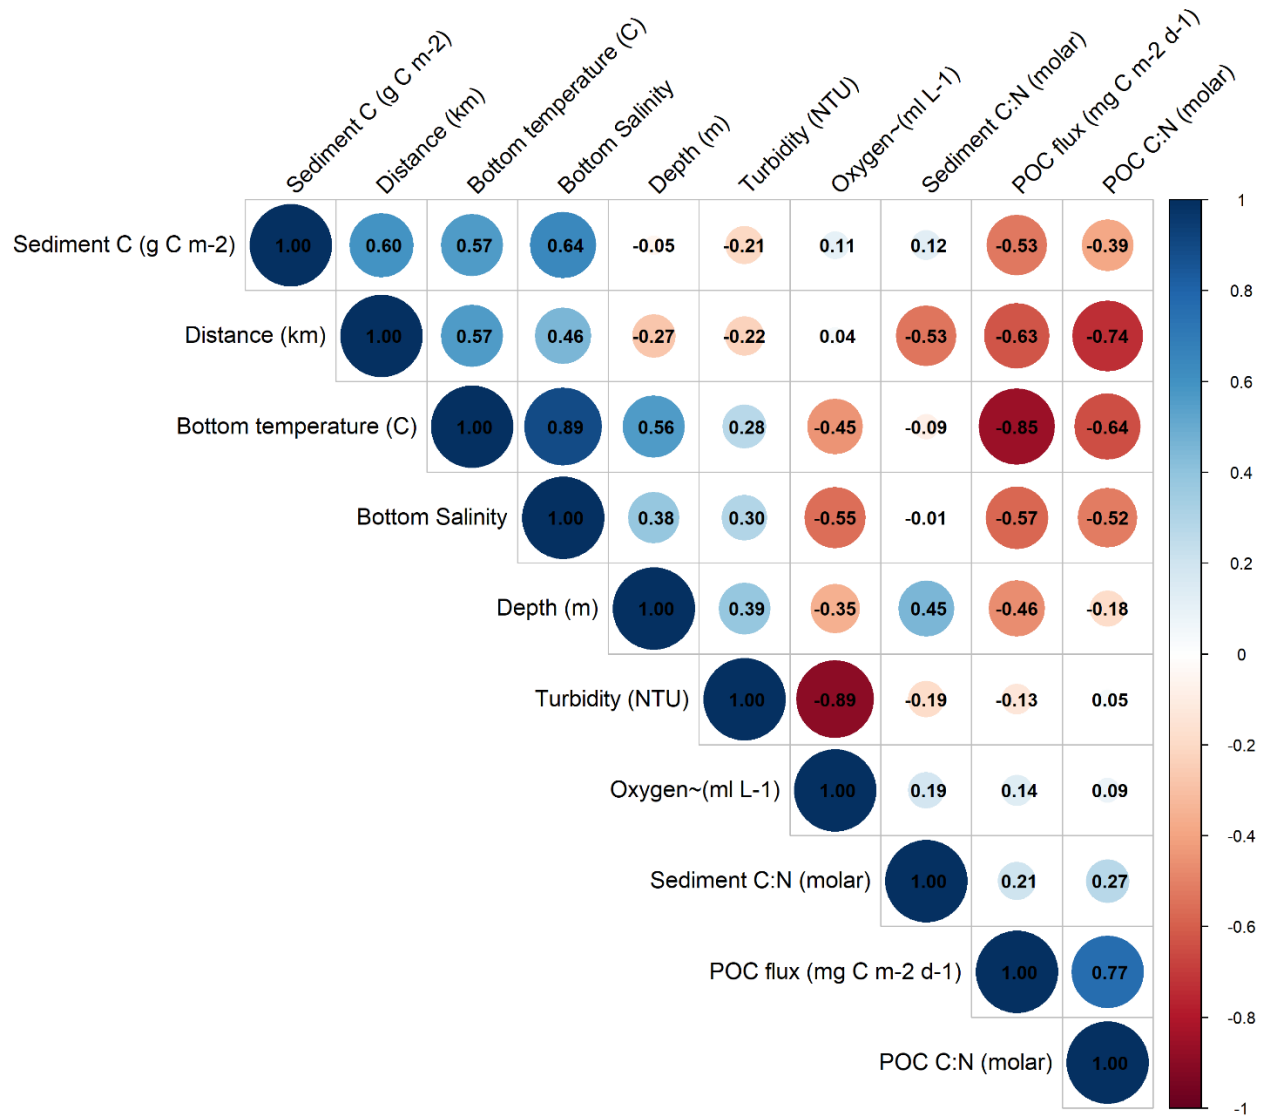

21

22

23 **GLLVM Model diagnostics and details**

24 **Figure S8.** Frequency distributions of benthic trait biomass values included in the Generalised Linear Latent  
25 Variable Models (GLLVMs). Histograms show the distribution of biomass across individual trait categories,  
26 highlighting strong right skew, continuous positive values, and the presence of zeros across traits. These  
27 characteristics justify the use of the Tweedie distribution, which accommodates zero-inflated, right-skewed  
28 continuous data typical of benthic biomass measurements.

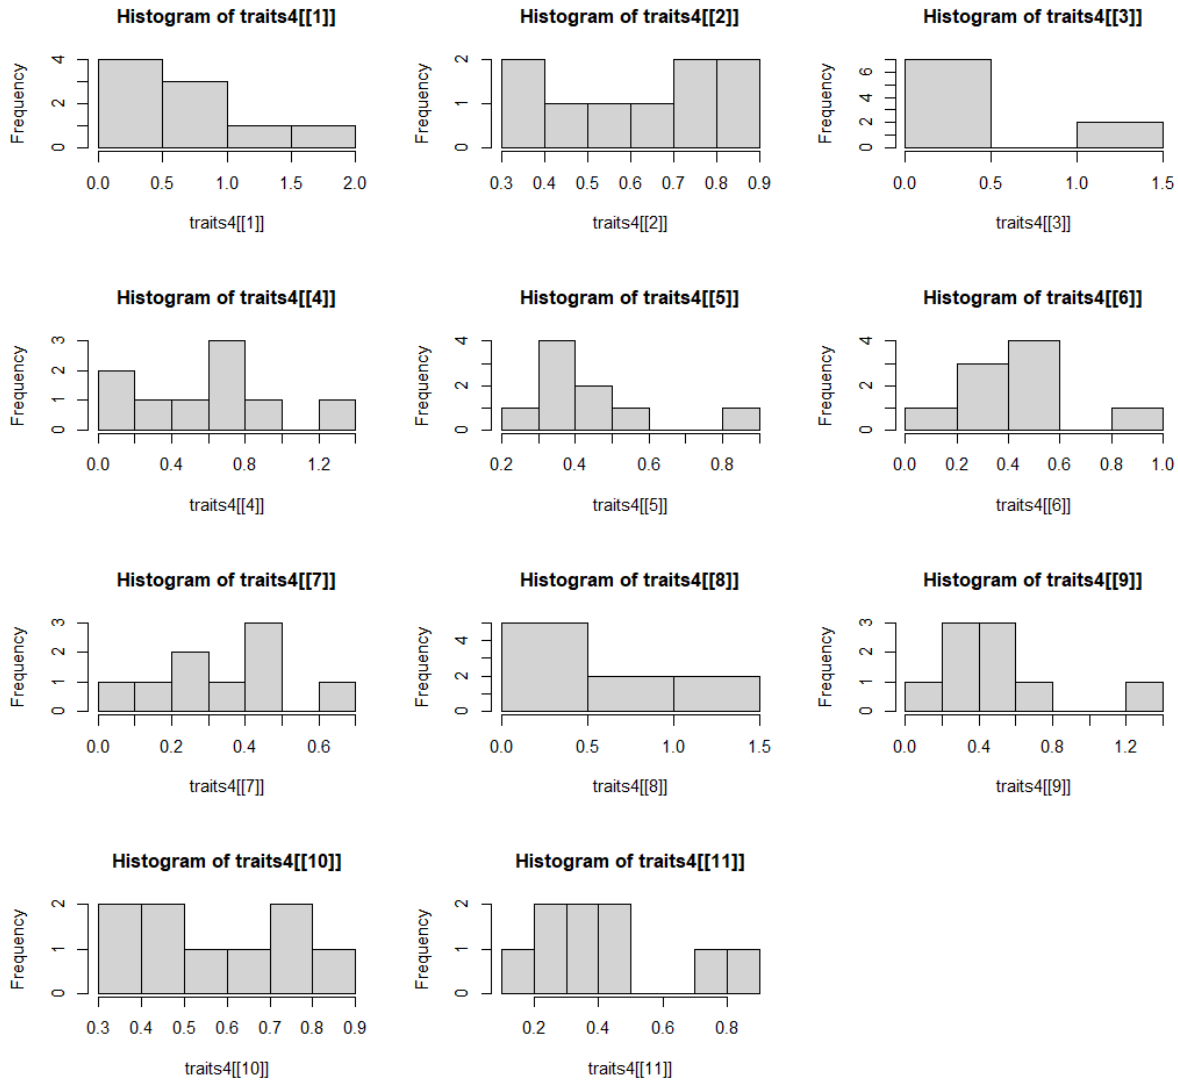

29

30

31 **Figure S9:** Diagnostic residual plots for the selected Generalised Latent Variable Model (GLLVM) with  
 32 one latent variable. Panels show Dunn–Smyth residuals plotted against (i) linear predictors, (ii) theoretical  
 33 quantiles (normal Q–Q plot), (iii) site index (rows), and (iv) trait biomass matrix index (columns), as well  
 34 as (v) scale–location residual patterns. The final panel (vi) shows the single latent variable (LV1) ordered  
 35 by sampling station (rather than LV1 score as shown in main text). Residuals show no major violations of  
 36 model assumptions, with approximately constant variance, no strong trends against predictors or station/trait  
 37 biomass, and acceptable normality of transformed residuals, indicating adequate model fit.

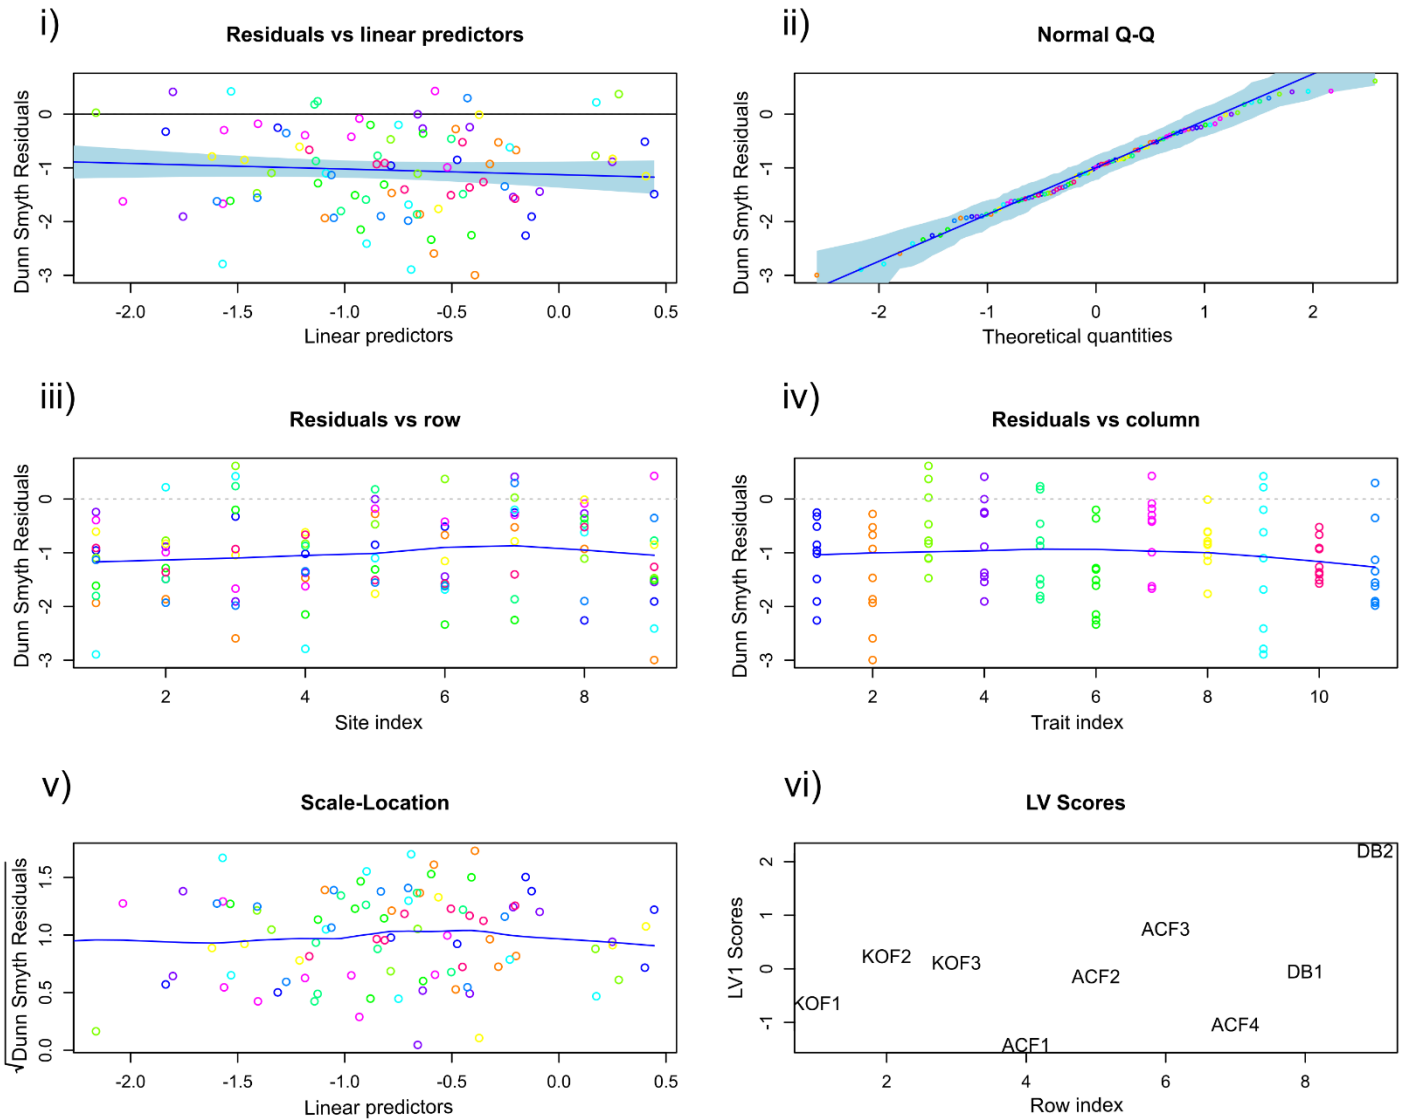

38

39

40 **Table S10i.** Akaike Information Criterion (AIC) values for Generalised Latent Variable Models (GLLVMs)  
 41 fitted with zero to three latent variables. Grey text indicates models that did not converge reliably (2 and 3  
 42 latent variables). Although AIC decreases with additional latent variables, only the model with one latent  
 43 variable represents a valid improvement in fit and is therefore selected as the best-supported model.

| <b>Latent variables</b> | <b>df</b> | <b>AIC</b> | <b>BIC</b> | <b>Convergence</b> | <b>LogLik</b> |
|-------------------------|-----------|------------|------------|--------------------|---------------|
| <b>0</b>                | 55        | 99.60582   | 242.3374   | Yes                | 5.197         |
| <b>1</b>                | 66        | 12.92206   | 184.2000   | Yes                | 59.539        |
| <b>2</b>                | 76        | -26.45624  | 170.7729   | No                 | 89.228        |
| <b>3</b>                | 85        | -54.87447  | 165.7107   | No                 | 89.228        |

44

45

46

47 **Table S10ii.** Latent variable variances ( $\sigma^2$ ) for Tweedie gllvm models fitted with 0–3 latent variables.  
 48 Variances near zero indicate unused or non-informative latent axes. While some model latent variable scores  
 49 may provide the higher values, they are not meaningful if the models do not converge.

| <b>Model (k LVs)</b> | <b>LV1</b> | <b>LV2</b> | <b>LV3</b> |
|----------------------|------------|------------|------------|
| <b>0</b>             | –          | –          | –          |
| <b>1</b>             | 0.835      | –          | –          |
| <b>2</b>             | 0.864      | 0.068      | –          |
| <b>3</b>             | 0.740      | 0.263      | 0.046      |

50

51

52 **Table S10iii.** Model selection results for Generalised Latent Variable Models (GLLVMs) fitted with two  
 53 latent variables, with and without system-level random effects. The null model (no latent variables, no  
 54 random effects) is shown for reference. Random effects represent system-specific deviations (Ardencaple  
 55 Fjord, Dove Bugt, and Kong Oscar Fjord). For each model, AIC, BIC, convergence status, and log-  
 56 likelihood (with effective degrees of freedom) are reported. Random effects are small in magnitude, and the  
 57 model without random effects provides the lowest AIC and similar log-likelihood, indicating no substantial  
 58 improvement in model fit when including system-level random variation.

| Latent variables | Random effect | Size of effects     | of random                         | AIC    | BIC     | Convergence | LogLik         |
|------------------|---------------|---------------------|-----------------------------------|--------|---------|-------------|----------------|
| Null             | N             | -                   |                                   | 15.555 | 101.194 | Yes         | 25.223 (df=33) |
| 2                | Y             | DB:<br>ACF:<br>KOF: | 5.19e-05<br>8.87e-06<br>-7.45e-05 | 14.948 | 188.820 | Yes         | 59.526 (df=67) |
| 2                | N             | -                   |                                   | 12.922 | 184.200 | Yes         | 59.539 (df=66) |

59

60

61 **Attenuation Coefficient**

62 **Figure S11i.** Depth-dependent attenuation of particulate organic carbon (POC) flux at individual sampling  
63 stations across Northeast Greenland coastal systems. Panels show log-transformed POC flux (logPOC)  
64 plotted against log-transformed water depth (logDepth) for each station (KOF1–3, ACF1–3, DB1). Black  
65 points represent measured sediment trap fluxes at discrete depths, and blue lines indicate station-specific  
66 linear fits describing depth-related attenuation. Red dashed vertical lines mark the approximate depth of the  
67 deepest sediment trap used to estimate predicted POC flux reaching the seafloor. Slopes differ among  
68 stations, illustrating variability in the rate of POC attenuation with depth across coastal systems and along  
69 inner–outer gradients.

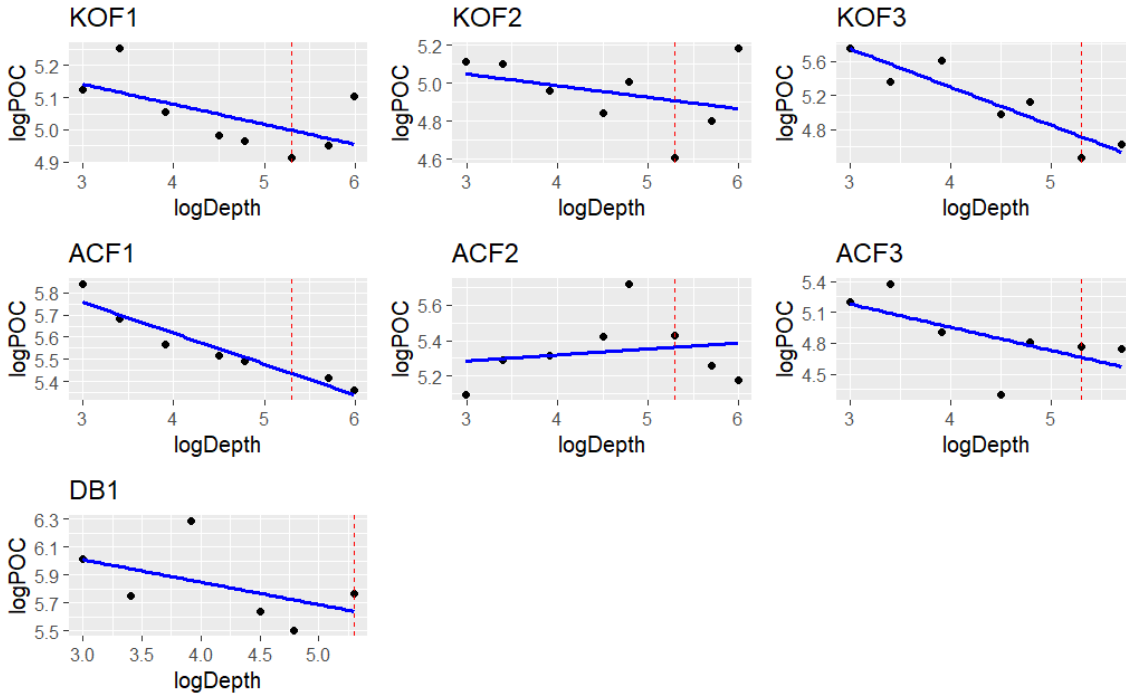

70  
71  
72  
73  
74

75 **Table S11ii.** Station-specific attenuation coefficients (b), deepest sediment trap depths and corresponding  
 76 measured POC fluxes, seafloor depths, and estimated POC flux at the seafloor calculated relative to the  
 77 deepest measured trap.

| Transect | Attenuation slope (b) | Deepest trap depth (m) | Deepest trap POC (mg C m <sup>-2</sup> d <sup>-1</sup> ) | Seafloor depth (m) | Predicted seafloor POC (mg C m <sup>-2</sup> d <sup>-1</sup> ) |
|----------|-----------------------|------------------------|----------------------------------------------------------|--------------------|----------------------------------------------------------------|
| KOF3     | -0.447                | 300                    | 102                                                      | 358                | 94                                                             |
| ACF3     | -0.225                | 300                    | 115                                                      | 390                | 108                                                            |
| ACF1     | -0.139                | 400                    | 212                                                      | 547                | 203                                                            |
| KOF1     | -0.062                | 400                    | 165                                                      | 604                | 161                                                            |
| KOF2     | -0.061                | 400                    | 179                                                      | 498                | 177                                                            |
| ACF2     | 0.034                 | 400                    | 177                                                      | 402                | 177                                                            |
| DB1      | -0.161                | 200                    | 318                                                      | 163                | 329                                                            |

78

79 **Figure S12.** Spatial variation in surface sediment carbon–nitrogen (C:N) ratios across Northeast Greenland  
80 coastal systems. Boxes represent the interquartile range with median values indicated, and whiskers denote  
81 the data range. Horizontal dashed lines indicate approximate reference ranges commonly associated with  
82 relatively low, intermediate, and high C:N values for marine sediments, shown here for visual context only.  
83 No isotopic or source-specific analyses were conducted, and C:N ratios are interpreted descriptively as an  
84 index of spatial variability in sediment organic matter composition rather than as a definitive indicator of  
85 carbon source.

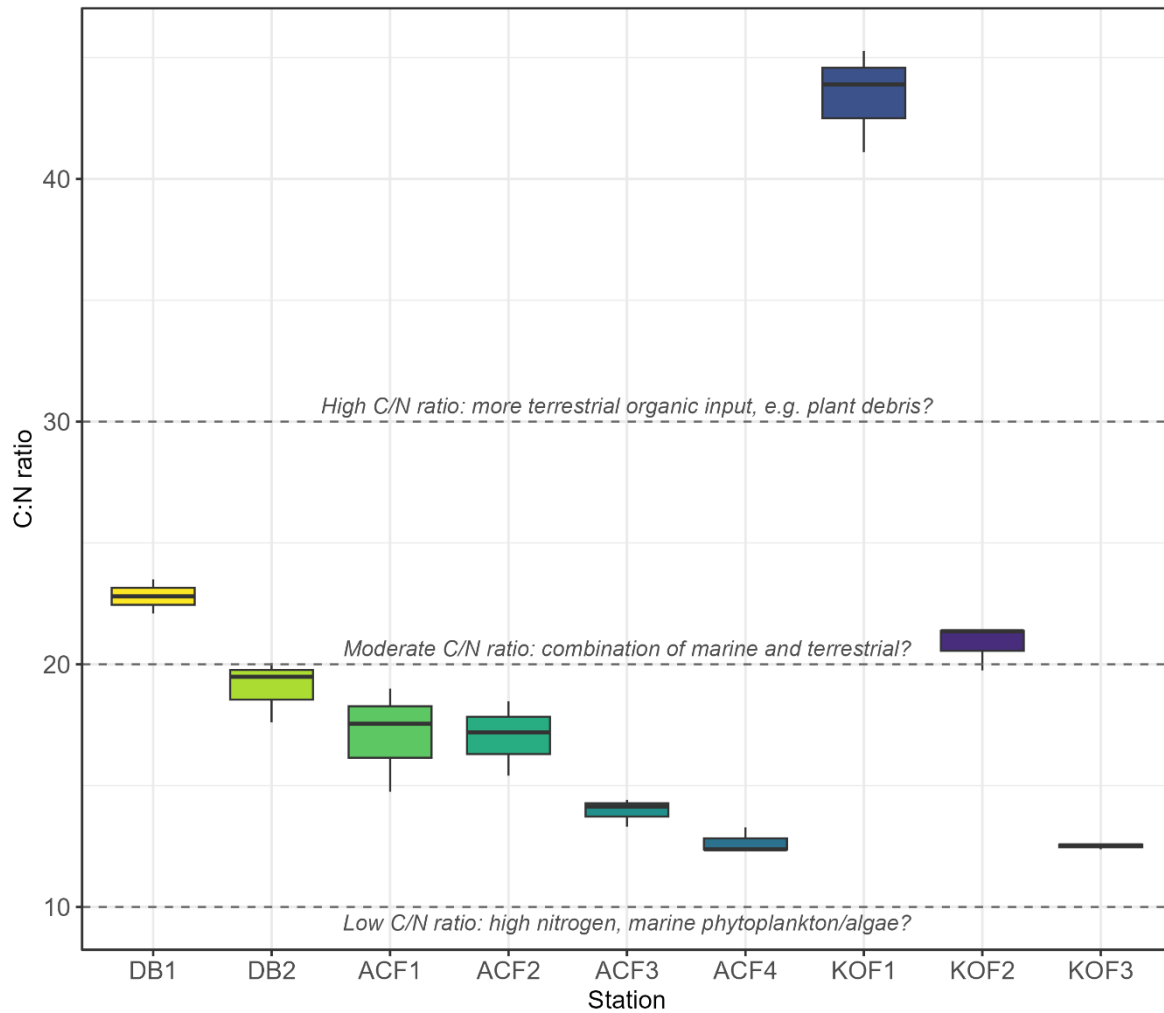

86

87

88

89

90 **Figure S13.** Potential linear relationships between latent variable and station-level functional diversity  
 91 metrics (Richness, Shannon, Simpson, Hill1, Hill2, Evenness), environmental variables (water depth, CN  
 92 flux, sediment CN ratio, dissolved oxygen, temperature, salinity, turbidity, and transect distance (inner –  
 93 outer), and bathymetric terrain variables (aspect, slope, ruggedness). Each point represents a sampling  
 94 station, labelled by station code. Lines show fitted linear regressions with 95% confidence intervals. Red  
 95 text reports the p-value and coefficient of determination ( $R^2$ ) for each model. Although none of the  
 96 relationships are statistically significant, the panels illustrate the relative direction and magnitude of  
 97 associations between the latent variable and diverse ecological and abiotic gradients, which may be useful  
 98 for future study.

### Bathymetry Variables

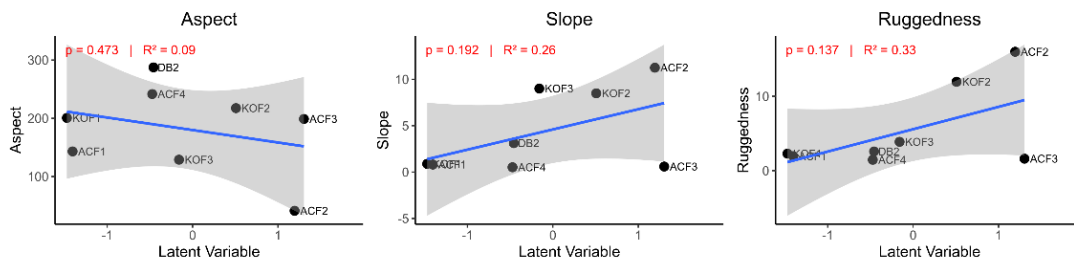

99

### Diversity Metrics

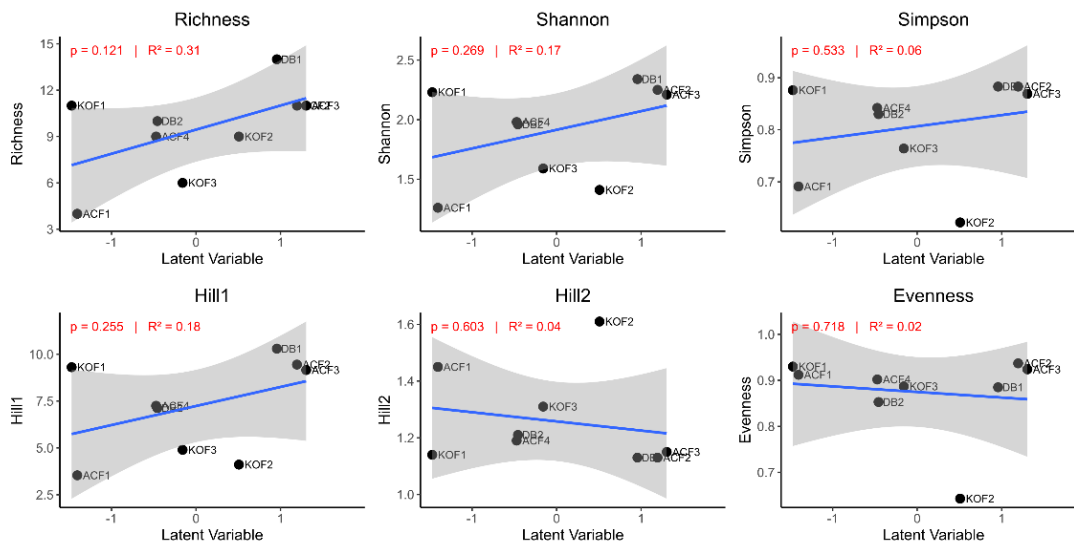

100

## Environmental Variables

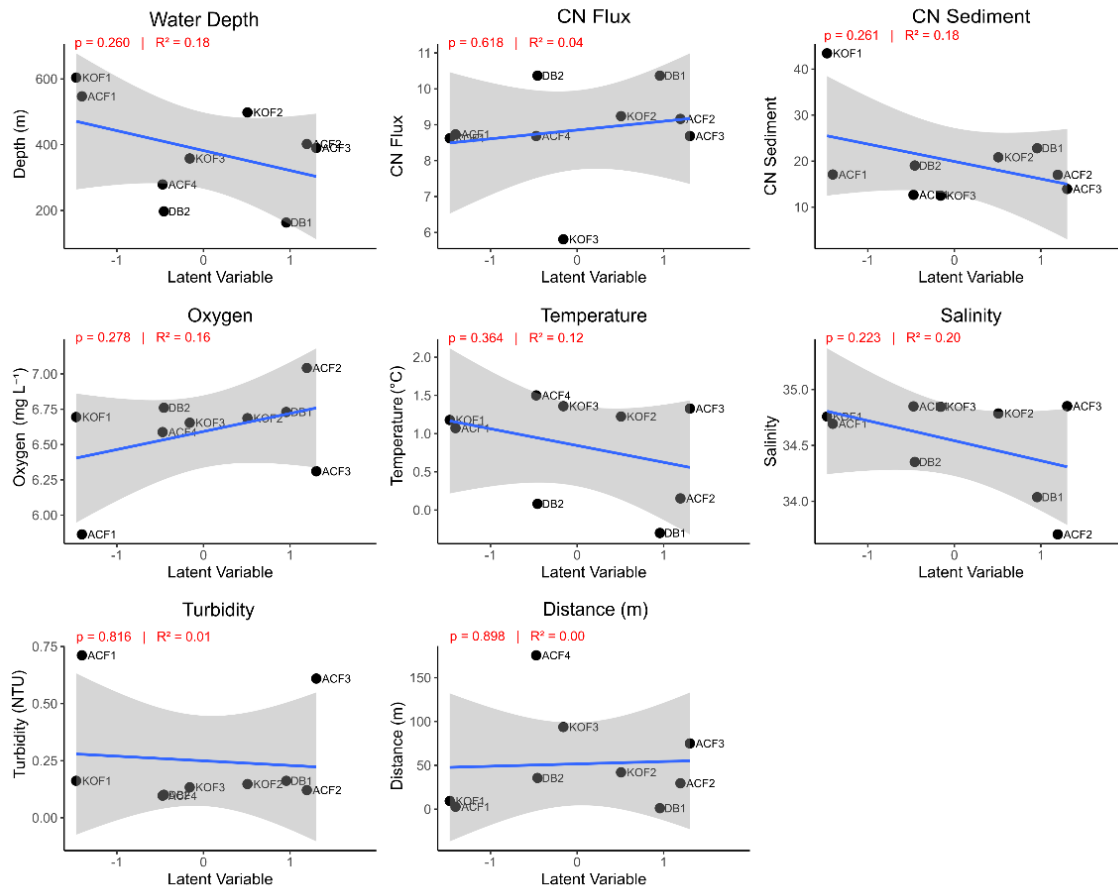

101

102

103

104

105 **Figure S14.** Conceptual schematic of hydrodynamic regimes, meltwater influence, and Atlantic Water  
 106 inflow structure vertical mixing and carbon delivery pathways, shaping spatial patterns of benthic biomass  
 107 and trait representation. Depth ranges are approximate and illustrate the typical hydrographic structure of  
 108 Northeast Greenland coastal systems.

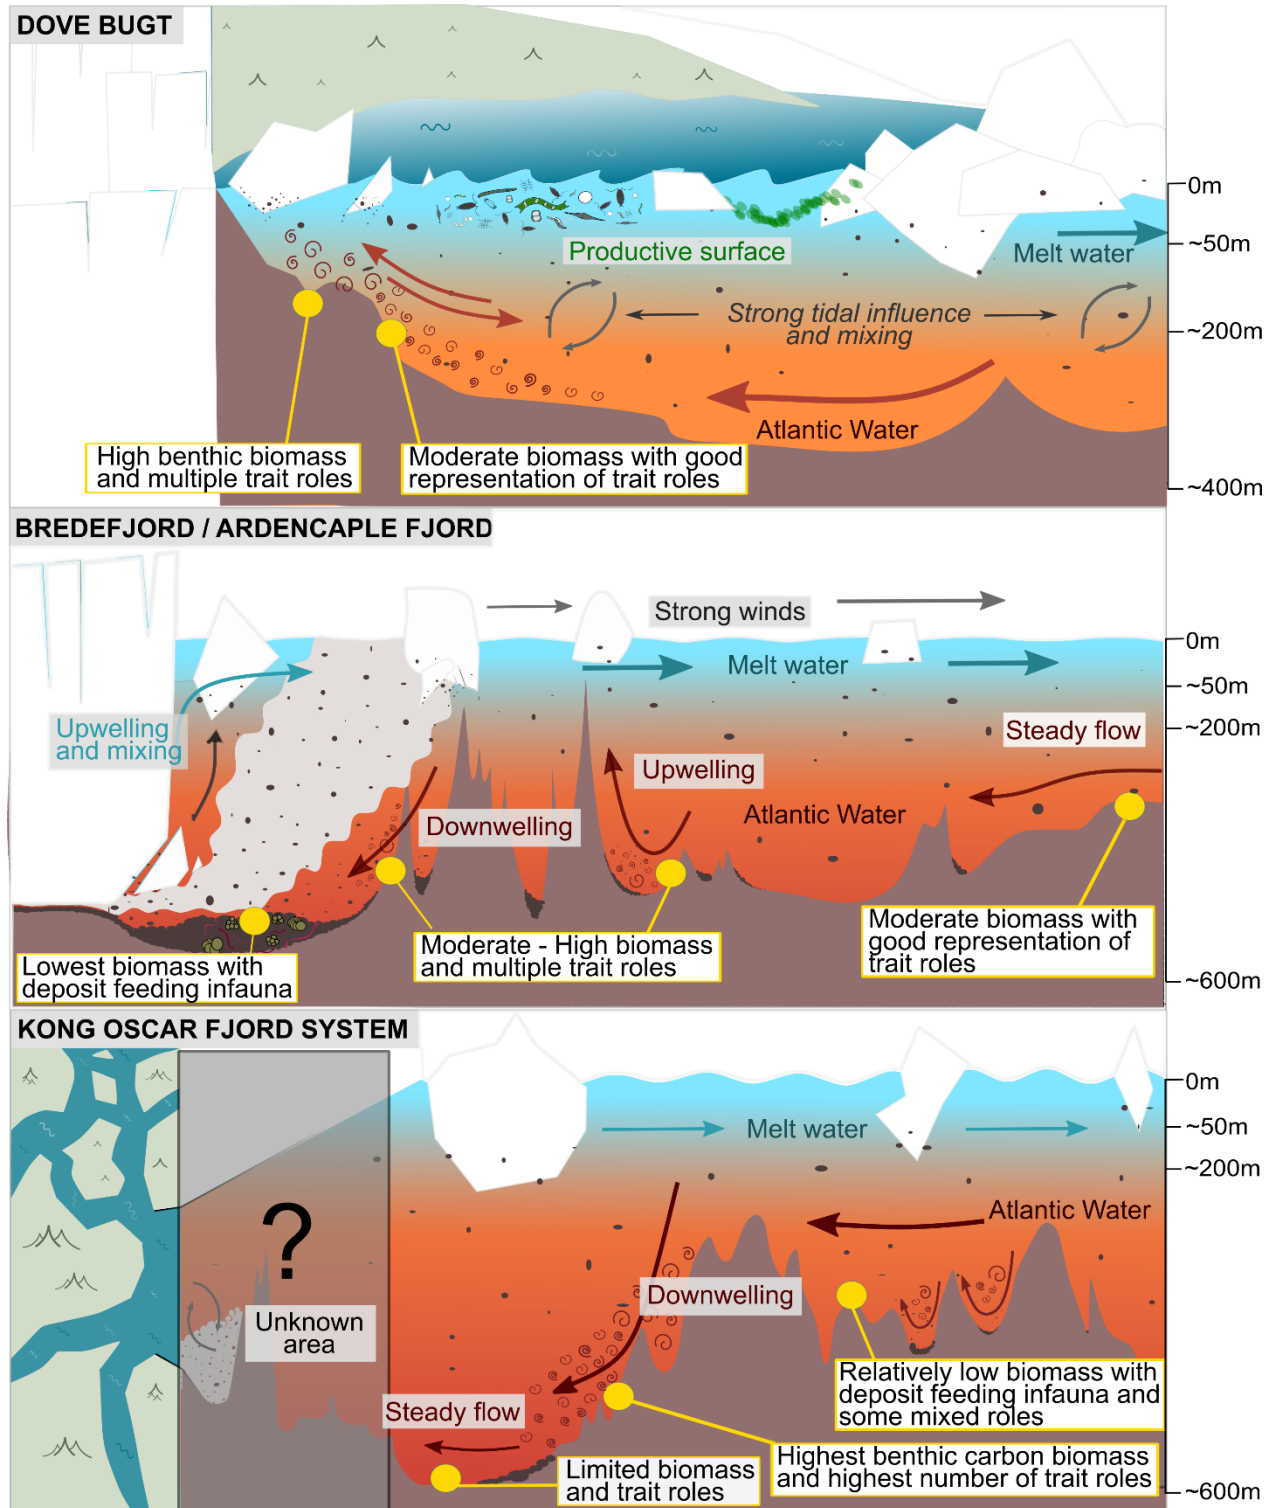

110 **Figure S15.** Enlarged benthic trait associations from Figs. 4-6 main text. Alluvial diagrams show the  
 111 relationships among environmental position (infauna, epifauna), feeding habit (e.g., deposit feeding,  
 112 filter/suspension feeding, mixed strategies), and movement mode (e.g., burrower, crawler, sessile). Each  
 113 panel represents an individual station across Kong Oscar Fjord (KOF1–KOF3), Ardencaple Fjord (ACF1–  
 114 ACF4), and Dove Bugt (DB1–DB2).

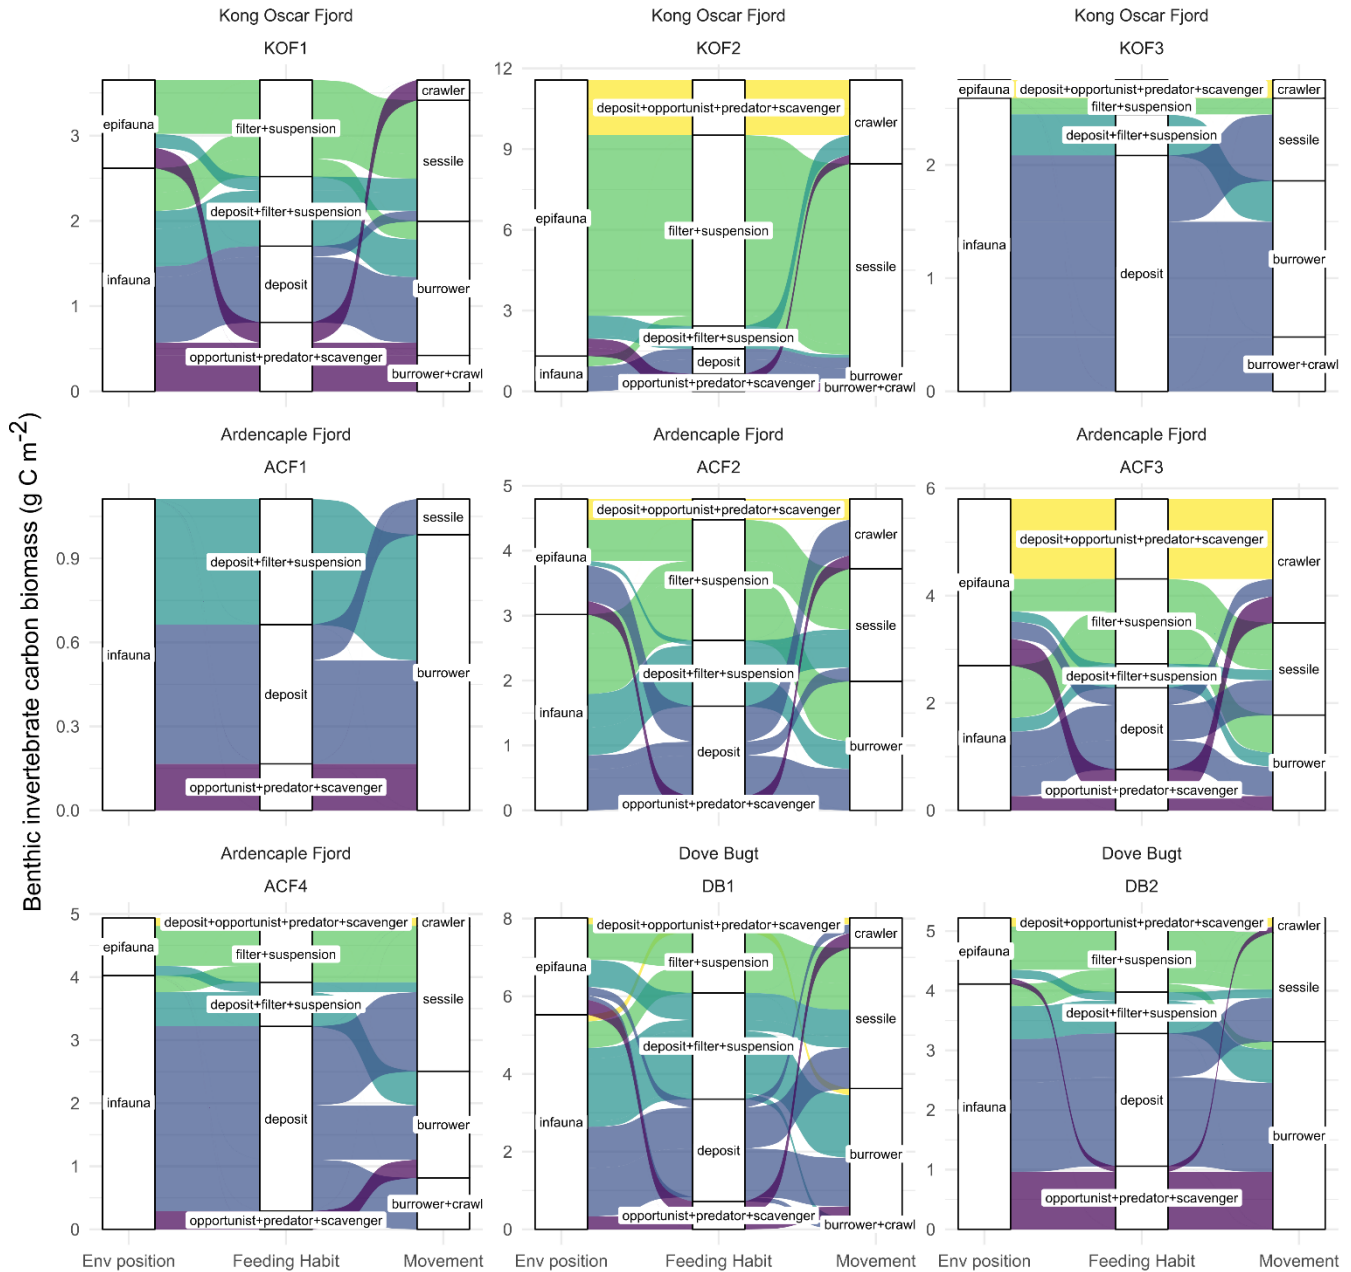

Supplement: Supplementary file 1 [file egusphere-2026-3268-supplement.pdf]
